# Supplementary material
Source: Springer Nature journal article supplement (https://www.springermedizin.de/resource/supplementary/13045_2009_77_MOESM8_ESM.pdf/9660612)

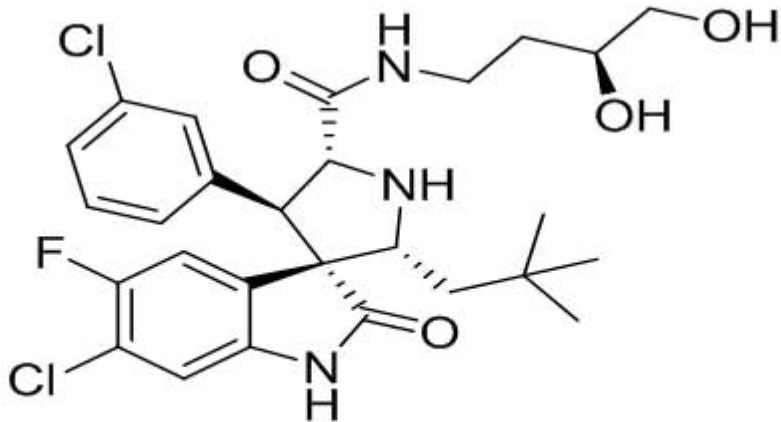

MI-219

Supplement: MOESM8 [file 9660612]
